# Supplementary material
Source: PubMed Central journal article supplement (PMC6446226)

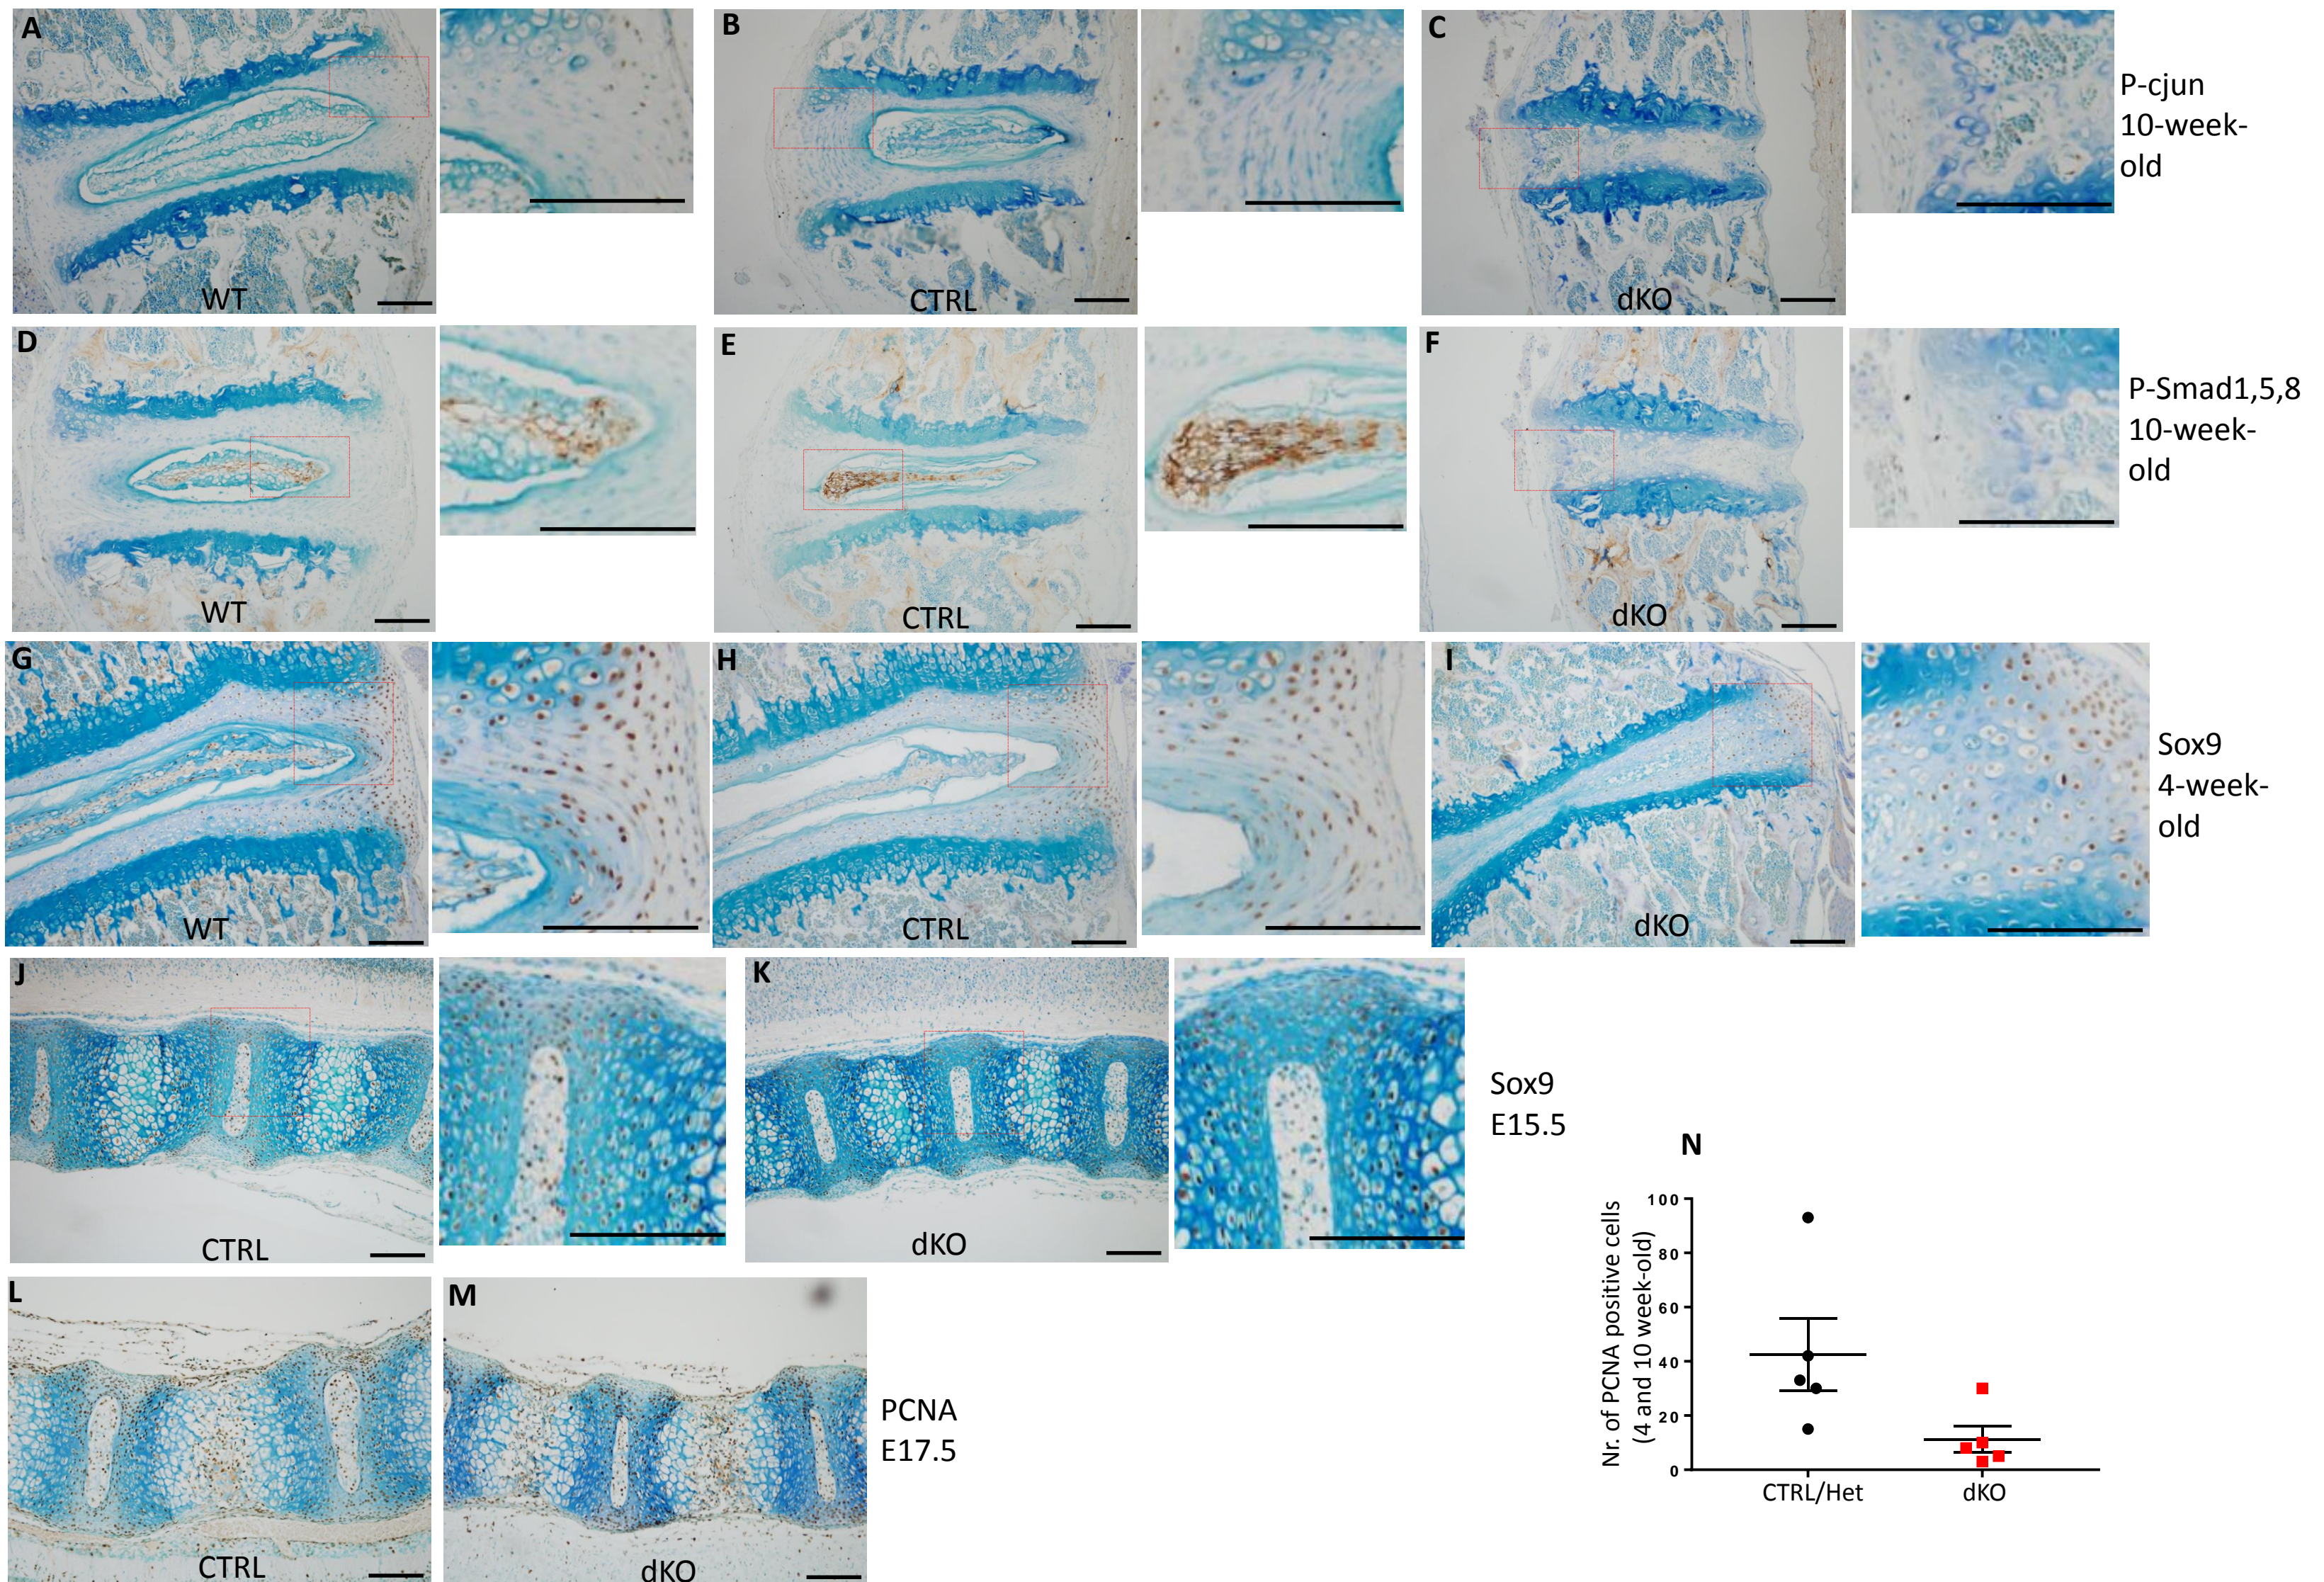

Supplement: mmc1.pdf [file mmc1.pdf]

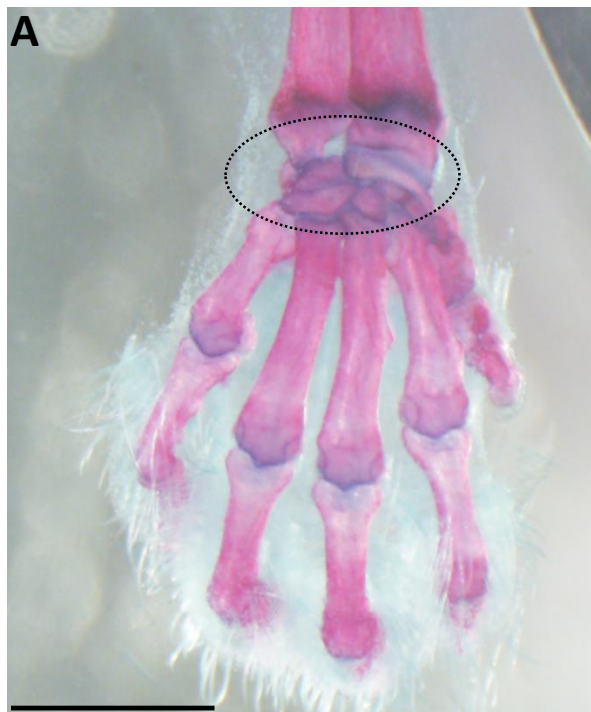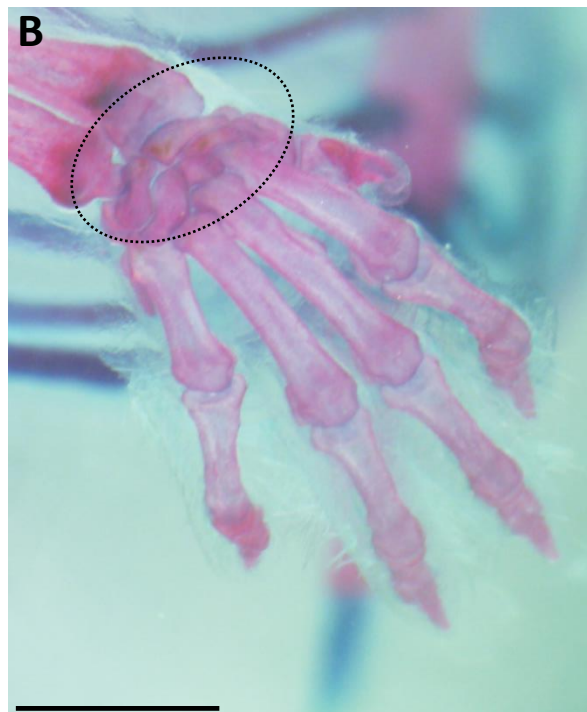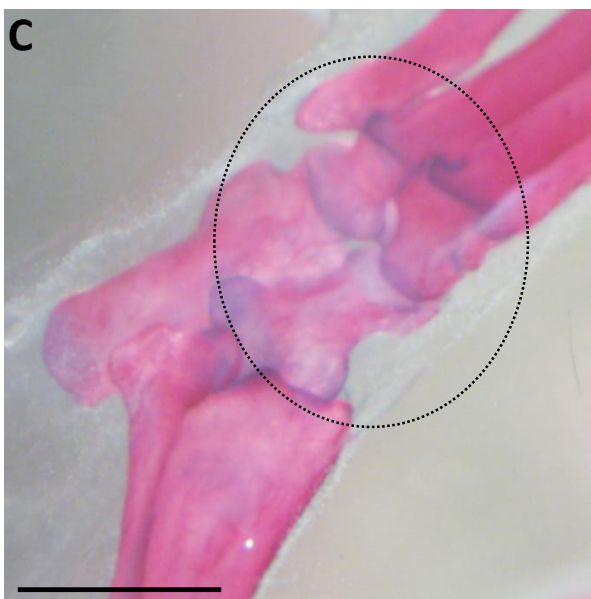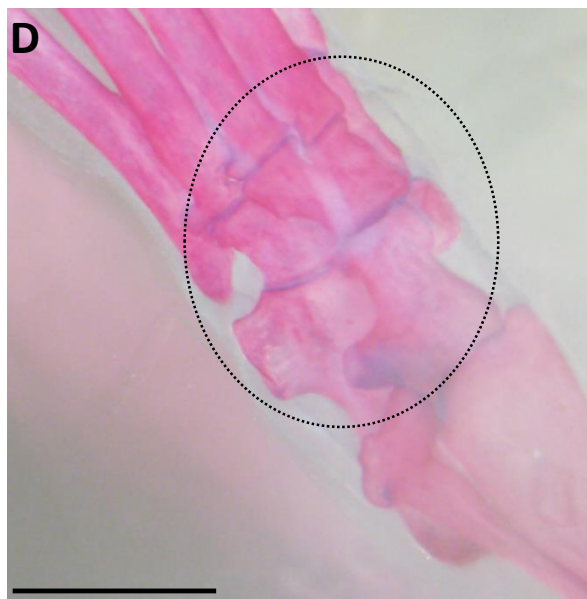

CTRL

dKO

Supplement: mmc2.pdf [file mmc2.pdf]
